# Supplementary material for: The Relationship between Nutrient Intake and Cataracts in the Older Adult Population of Korea
Source: MDPI journal article supplement (doi:10.3390/nu14234962), 2022-11-23
Supplement: s1 [file s1]

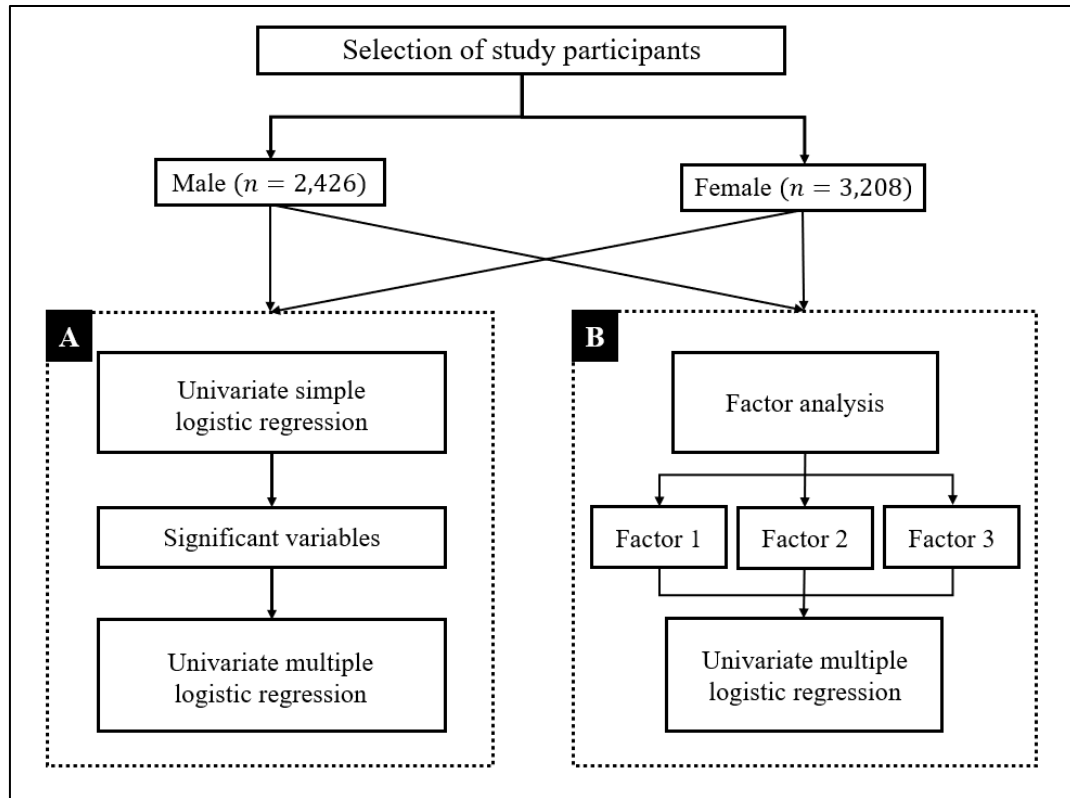

**Figure S1.** Overall statistical analysis method (A) For male and female, significant variables were extracted through univariate simple logistic regression. Then, univariate multiple logistic regression was performed using extracted variables. (B) For male and female, three factors were extracted from independent variables by factor analysis. Then, we performed univariate multiple logistic regression using extracted factors.

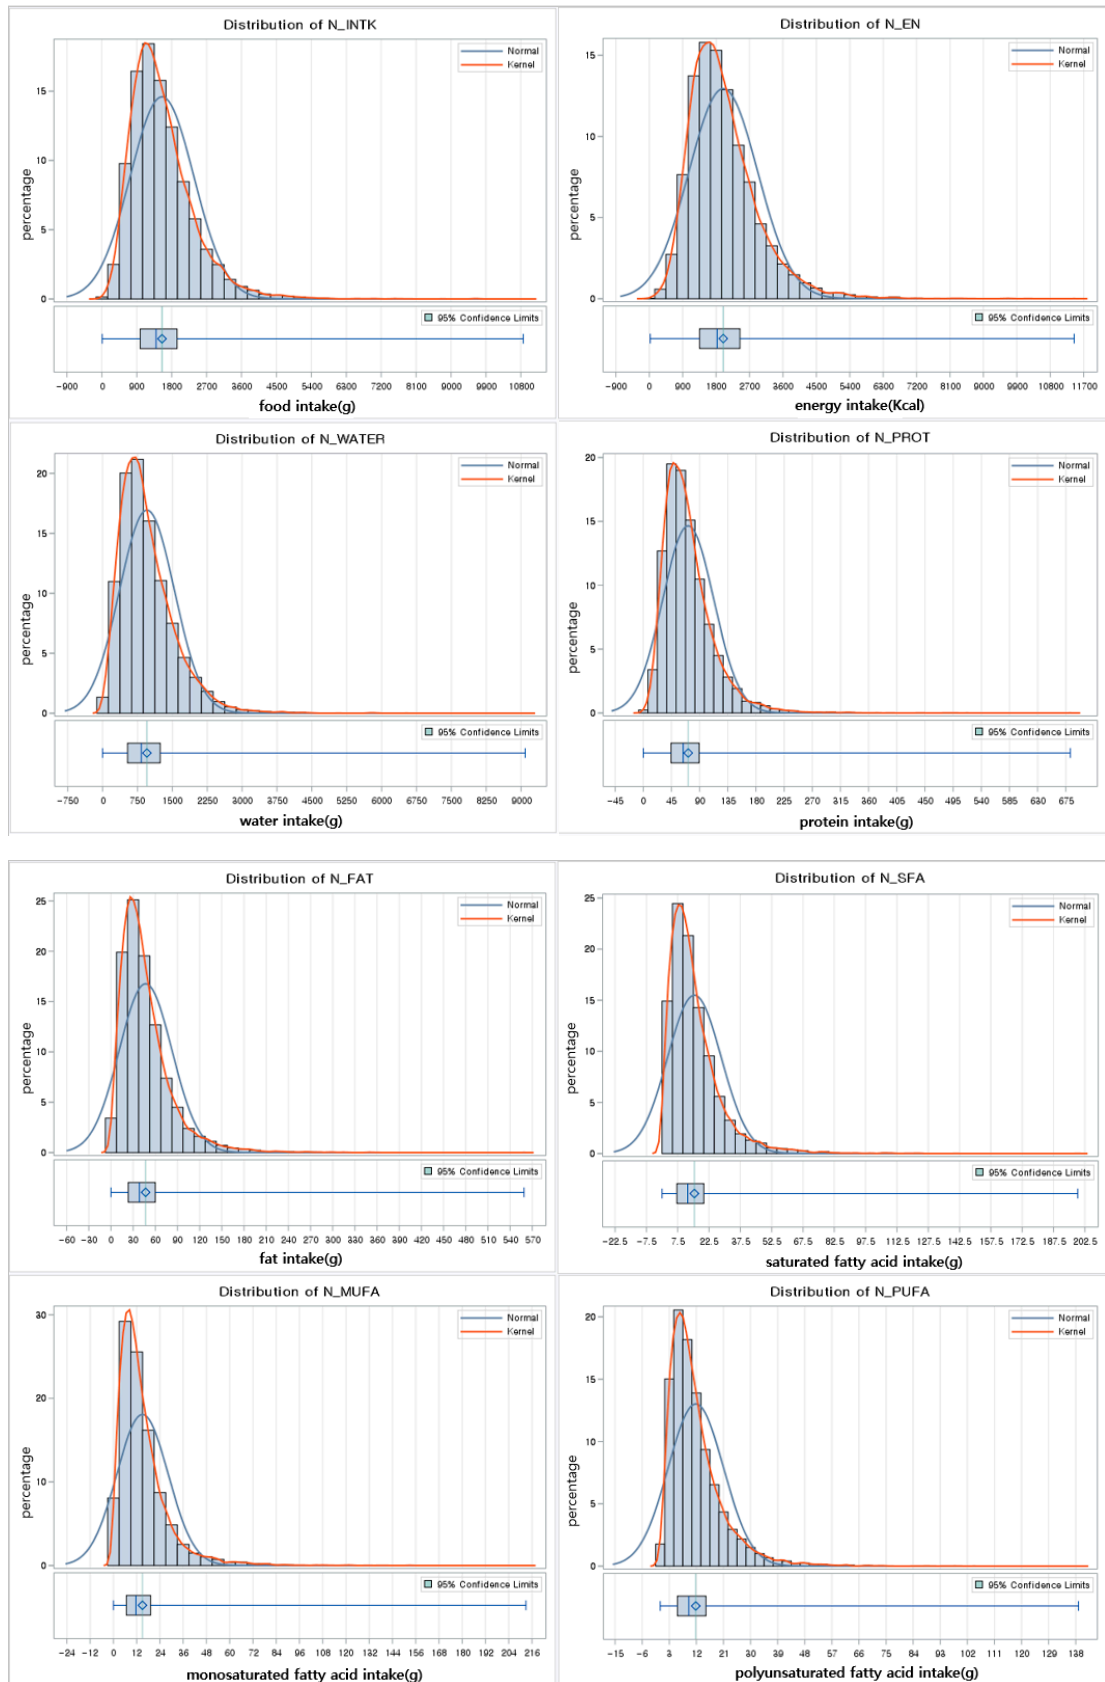

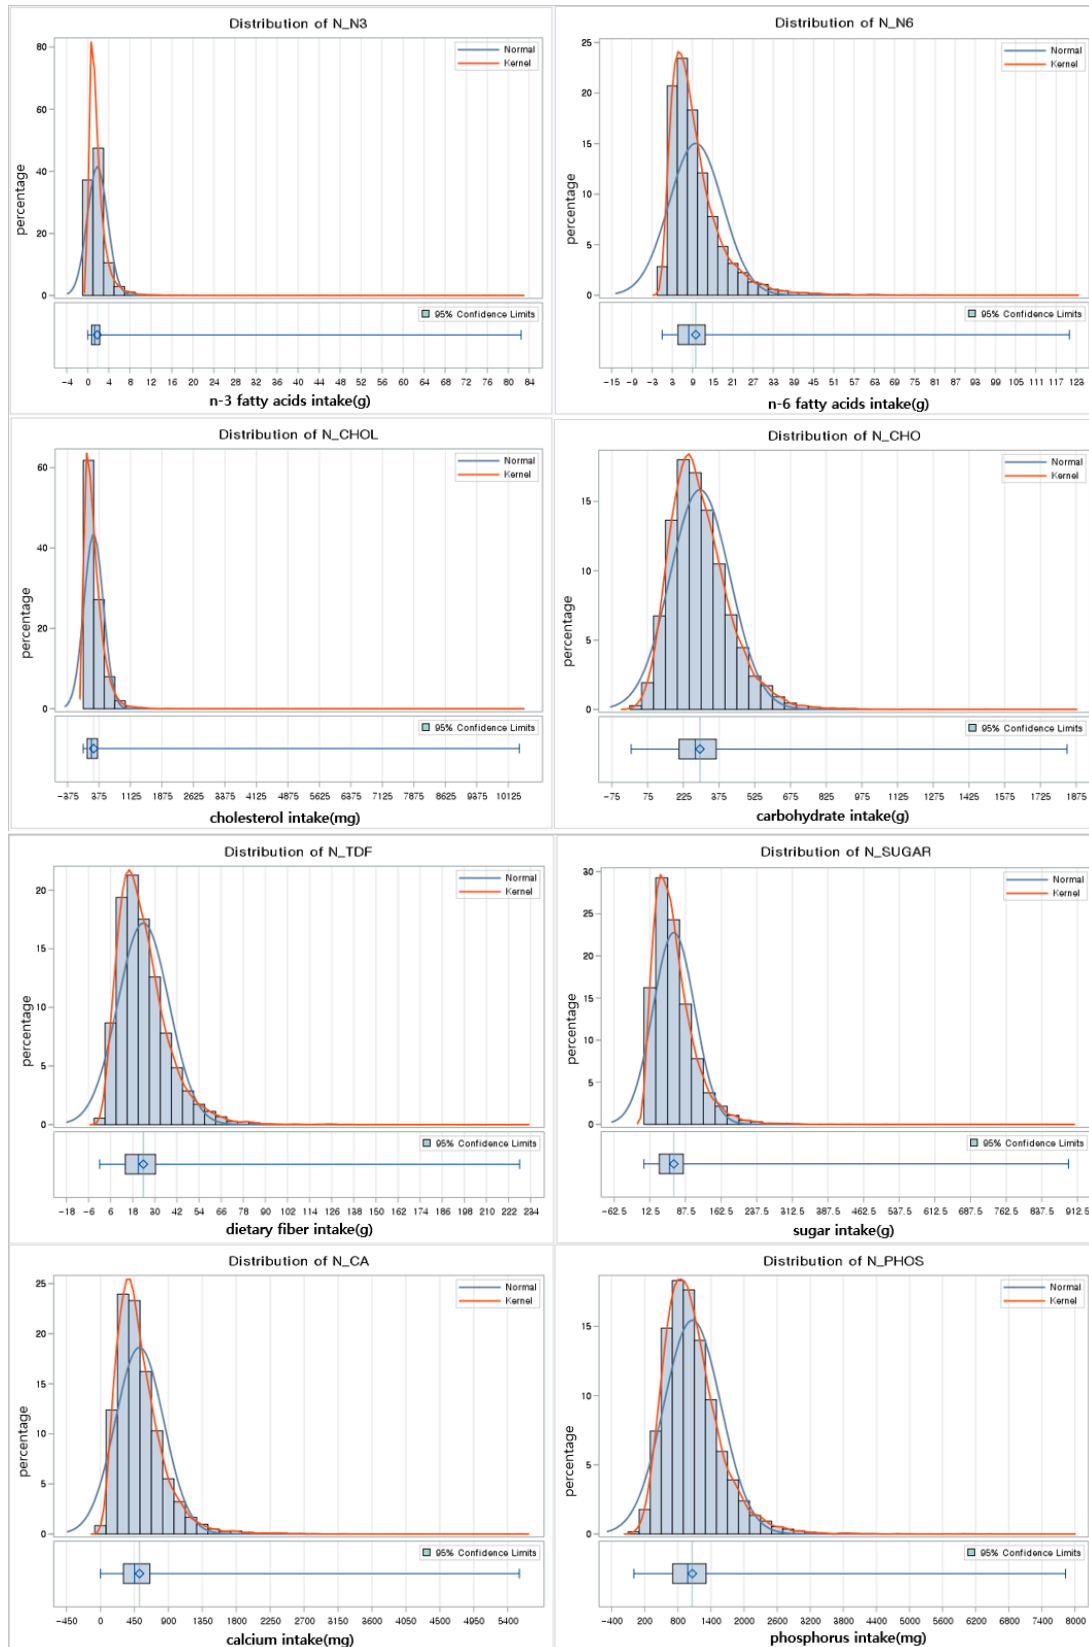

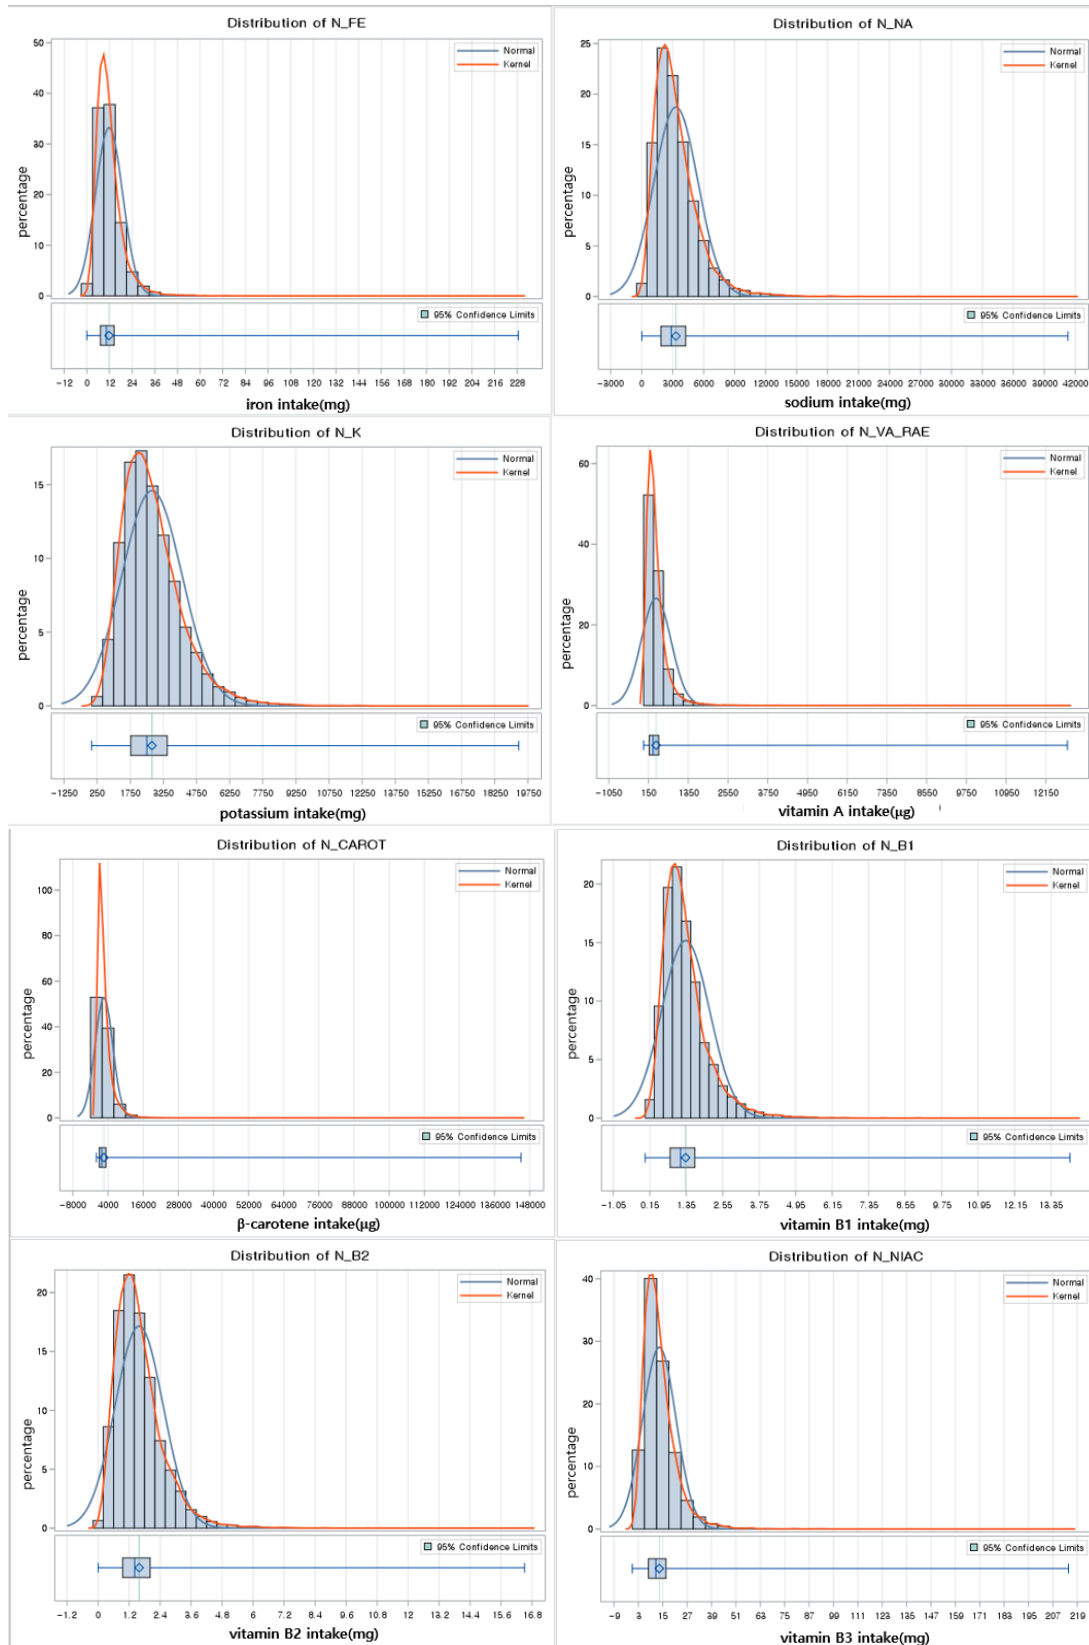

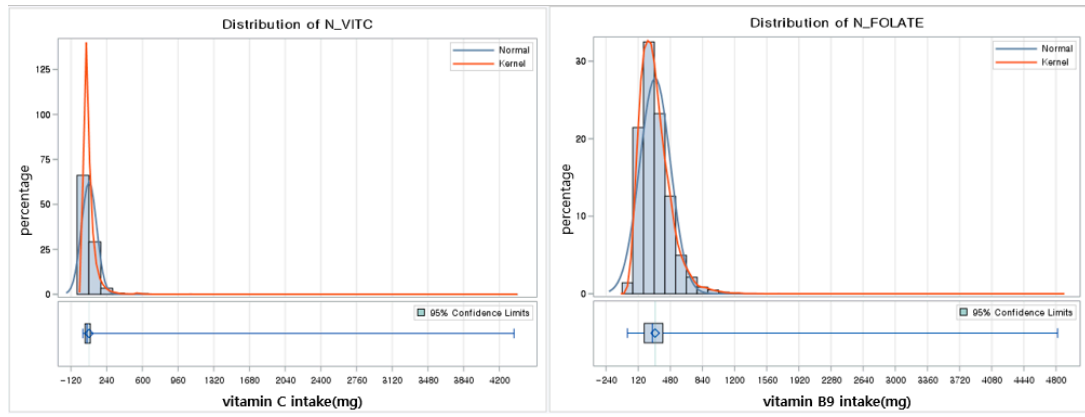

**Figure S2.** The distribution of 25 nutrient variables.

**Table S1.** Kolmogorov-Smirnov test performed to confirm the distribution of our data.

| <b>Nutrition</b>            | <i>P</i> -value |
|-----------------------------|-----------------|
| Water                       | 0.18586         |
| Protein                     | 0.20624         |
| Fat                         | 0.27747         |
| Saturated fatty acids       | 0.27640         |
| Monounsaturated fatty acids | 0.27825         |
| Polyunsaturated fatty acids | 0.21894         |
| Omega-3 fatty acid          | 0.13337         |
| Omega-6 fatty acid          | 0.23348         |
| Cholesterol                 | 0.24899         |
| Carbohydrates               | 0.07303         |
| Dietary fiber               | 0.05113         |
| Sugar                       | 0.16779         |
| Calcium                     | 0.12651         |
| Phosphorus                  | 0.17320         |
| Iron                        | 0.10938         |
| Sodium                      | 0.15738         |
| Potassium                   | 0.12478         |
| Vitamin A                   | 0.13777         |
| Carotene                    | 0.09626         |
| Vitamin B1                  | 0.14638         |
| Vitamin B2                  | 0.21669         |
| Vitamin B3                  | 0.23220         |
| Vitamin B9                  | 0.08047         |
| Vitamin C                   | 0.08528         |

**Table S2.** The results of Student *t*-test and Cohen's *d* for study population.

| Variables                   | <i>P</i> -value |                | Cohen's <i>d</i> |        |
|-----------------------------|-----------------|----------------|------------------|--------|
|                             | Male            | Female         | Male             | Female |
| <b>Nutrient intake</b>      |                 |                |                  |        |
| Food intake                 | <i>p</i> <.001  | <i>p</i> <.001 | 0.23             | 0.22   |
| Energy                      | 0.0002          | <i>p</i> <.001 | 0.17             | 0.2    |
| Water                       | <i>p</i> <.001  | <i>p</i> <.001 | 0.21             | 0.21   |
| Protein                     | <i>p</i> <.001  | <i>p</i> <.001 | 0.18             | 0.22   |
| Fat                         | 0.0643          | <i>p</i> <.001 | 0.08             | 0.18   |
| Saturated fatty acids       | 0.0884          | <i>p</i> <.001 | 0.08             | 0.16   |
| Monounsaturated fatty acids | 0.0383          | <i>p</i> <.001 | 0.09             | 0.18   |
| Polyunsaturated fatty acids | 0.2222          | <i>p</i> <.001 | 0.06             | 0.13   |
| Omega-3 fatty acid          | 0.3877          | 0.0805         | 0                | 0.09   |
| Omega-6 fatty acid          | 0.2528          | <i>p</i> <.001 | 0.05             | 0.13   |
| Cholesterol                 | 0.0129          | 0.0009         | 0.12             | 0.13   |
| Carbohydrates               | 0.0137          | 0.0001         | 0.11             | 0.15   |
| Dietary fiber               | 0.0212          | <i>p</i> <.001 | 0.09             | 0.15   |
| Sugar                       | 0.0135          | <i>p</i> <.001 | 0.11             | 0.17   |
| Calcium                     | 0.0043          | 0.0236         | 0.13             | 0.08   |
| Phosphorus                  | 0.0008          | <i>p</i> <.001 | 0.16             | 0.18   |
| Iron                        | 0.0128          | 0.0007         | 0.11             | 0.12   |
| Sodium                      | 0.0145          | 0.0015         | 0.11             | 0.13   |
| Potassium                   | 0.0006          | <i>p</i> <.001 | 0.16             | 0.19   |
| Vitamin A                   | <i>p</i> <.001  | <i>p</i> <.001 | 0.16             | 0.13   |
| Carotene                    | 0.0210          | 0.0006         | 0.11             | 0.13   |
| Vitamin B1                  | 0.0002          | 0.0013         | 0.18             | 0.13   |
| Vitamin B2                  | 0.0007          | <i>p</i> <.001 | 0.24             | 0.27   |
| Vitamin B3                  | <i>p</i> <.001  | <i>p</i> <.001 | 0.16             | 0.18   |
| Vitamin B9                  | <i>p</i> <.001  | <i>p</i> <.001 | 0.12             | 0.14   |
| Vitamin C                   | 0.0185          | 0.0500         | 0.12             | 0.07   |

\* *P*-value < 0.05\*\* *P*-value < 0.01

**Table S3.** The results of univariate simple logistic regression on nutrient intake for cataract among male and female.

| Variable                    |                                                 | Male                          | Female                         |
|-----------------------------|-------------------------------------------------|-------------------------------|--------------------------------|
|                             |                                                 | Odds Ratio (95% CI)           | Odds Ratio (95% CI)            |
| Water                       | Low - mid                                       | 1.110 (0.883-1.395)           | <b>1.500 (1.238-1.818) **</b>  |
|                             | High - mid                                      | <b>0.639 (0.501-0.816) **</b> | 0.853 (0.692-1.052)            |
| Protein                     | Low - mid                                       | 1.178 (0.944-1.469)           | <b>1.344 (1.112-1.624) **</b>  |
|                             | High - mid                                      | <b>0.716 (0.535-0.957) **</b> | <b>0.733 (0.580-0.926)</b>     |
| Fat                         | Low - mid                                       | 1.168 (0.950-1.435)           | 1.207 (1.000-1.457)            |
|                             | High - mid                                      | 0.817 (0.591-1.130)           | <b>0.657 (0.491-0.879) **</b>  |
| Saturated fatty acids       | Low - mid                                       | 1.239 (0.995-1.544)           | <b>1.266 (1.062-1.508) **</b>  |
|                             | High - mid                                      | 1.011 (0.739-1.384)           | <b>0.711 (0.506-0.999)</b>     |
| Monounsaturated fatty acids | Low - mid                                       | 1.261 (1.023-1.554)           | 1.153 (0.962-1.382)            |
|                             | High - mid                                      | 0.853 (0.568-1.282)           | <b>0.651 (0.493-0.860) **</b>  |
| Polyunsaturated fatty acids | Low - mid                                       | 1.044 (0.846-1.290)           | <b>1.428 (1.195-1.705) **</b>  |
|                             | High - mid                                      | 0.940 (0.703-1.256)           | 0.873 (0.689-1.105)            |
| Omega-3 fatty acid          | Low - mid                                       | 1.118 (0.887-1.409)           | <b>1.325 (1.086-1.617) **</b>  |
|                             | High - mid                                      | 0.975 (0.773-1.229)           | 0.912 (0.740-1.123)            |
| Omega-6 fatty acid          | Low - mid                                       | 1.120 (0.885-1.371)           | <b>1.217 (1.012-1.462) **</b>  |
|                             | High - mid                                      | 1.008 (0.752-1.350)           | <b>0.743 (0.583-0.946) **</b>  |
| Cholesterol                 | Low - mid                                       | 1.246 (1.004-1.547)           | <b>1.382 (1.150-1.662) **</b>  |
|                             | High - mid                                      | 0.946 (0.707-1.265)           | 1.015 (0.793-1.299)            |
| Carbohydrates               | Low - mid                                       | 1.015 (0.790-1.304)           | <b>1.278 (1.014-1.611) **</b>  |
|                             | High - mid                                      | 0.773 (0.614-0.974)           | <b>0.786 (0.649-0.951) **</b>  |
| Dietary fiber               | Low - mid                                       | 0.920 (0.691-1.227)           | <b>1.361 (1.089-1.701) **</b>  |
|                             | High - mid                                      | <b>0.754 (0.604-0.941) *</b>  | <b>0.750 (0.621-0.905) **</b>  |
| Sugar                       | Low - mid                                       | 1.017 (0.799-1.294)           | <b>1.537 (1.274-1.854) **</b>  |
|                             | High - mid                                      | 0.747 (0.571-0.978)           | 0.836 (0.672-1.040)            |
| Calcium                     | Low - mid                                       | 1.200 (0.937-1.538)           | <b>1.244 (1.018-1.519) **</b>  |
|                             | High - mid                                      | <b>0.838 (0.657-1.068) *</b>  | <b>0.819 (0.677-0.992) **</b>  |
| Phosphorus                  | Low - mid                                       | 1.089 (0.871-1.361)           | <b>1.403 (1.157-1.701) **</b>  |
|                             | High - mid                                      | 0.787 (0.610-1.015)           | 0.834 (0.683-1.019)            |
| Iron                        | Low - mid                                       | 0.975 (0.749-1.269)           | <b>1.333 (1.074-1.654) **</b>  |
|                             | High - mid                                      | 0.774 (0.606-0.987)           | 0.869 (0.722-1.046)            |
| Sodium                      | Low - mid                                       | 1.050 (0.849-1.298)           | 1.190 (0.982-1.442)            |
|                             | High - mid                                      | 0.860 (0.666-1.109)           | 0.905 (0.738-1.108)            |
| Potassium                   | Low - mid                                       | 0.985 (0.770-1.260)           | 1.444 (1.167-1.785)            |
|                             | High - mid                                      | <b>0.737 (0.590-0.920) *</b>  | <b>0.770 (0.638-0.928) **</b>  |
| Vitamin A                   | Low - mid                                       | 1.131 (0.880-1.453)           | <b>1.625 (1.338-1.973) **</b>  |
|                             | High - mid                                      | 0.852 (0.644-1.127)           | 1.029 (0.812-1.303)            |
| Carotene                    | Low - mid                                       | 0.909 (0.706-1.171)           | <b>1.329 (1.088-1.623) **</b>  |
|                             | High - mid                                      | 0.761 (0.602-0.963)           | 0.830 (0.681-1.012)            |
| Vitamin B1                  | Low - mid                                       | 1.126 (0.895-1.418)           | <b>1.312 (1.061-1.621) **</b>  |
|                             | High - mid                                      | <b>0.640 (0.494-0.829) **</b> | 0.868 (0.709-1.063)            |
| Vitamin B2                  | Low - mid                                       | 1.213 (0.968-1.520)           | <b>1.593 (1.320-1.922) **</b>  |
|                             | High - mid                                      | 0.806 (0.620-1.047)           | 0.963 (0.779-1.191)            |
| Vitamin B3                  | Low - mid                                       | 1.278 (1.032-1.582)           | <b>1.571 (1.300-1.899) **</b>  |
|                             | High - mid                                      | <b>0.694 (0.529-0.912) **</b> | 0.845 (0.669-1.068)            |
| Vitamin B9                  | Low - mid                                       | 0.962 (0.756-1.225)           | <b>1.336 (1.093-1.634) **</b>  |
|                             | High - mid                                      | 0.786 (0.617-1.000)           | 0.844 (0.699-1.019)            |
| Vitamin C                   | Low - mid                                       | 1.140 (0.916-1.419)           | <b>1.314 (1.073-1.609) **</b>  |
|                             | High - mid                                      | 0.824 (0.649-1.046)           | 0.917 (0.750-1.122)            |
| Food intake                 | Low - mid                                       | 1.262 (1.011-1.575)           | <b>1.476 (1.217-1.790) **</b>  |
|                             | High - mid                                      | <b>0.699 (0.536-0.911) **</b> | 0.815 (0.656-1.013)            |
| Energy                      | Low - mid                                       | 1.085 (0.866-1.359)           | 1.329 (1.082-1.633)            |
|                             | High - mid                                      | <b>0.595 (0.454-0.780) **</b> | <b>0.719 (0.585-0.883) **</b>  |
| Education                   | Less than middle school-higher than high school | <b>1.248 (1.033-1.508) *</b>  | <b>1.690 (1.3868-2.086) **</b> |



|                           |                                        |                               |                               |
|---------------------------|----------------------------------------|-------------------------------|-------------------------------|
| National basic livelihood | Non-beneficiaries -<br>beneficiaries   | 1.275 (0.899-1.809)           | <b>2.038 (1.563-2.658) **</b> |
| Marital status            | Single - married                       | 1.351 (0.558-3.274)           | 1.339 (0.560-3.206)           |
| Age                       | 60s – 70s                              | <b>0.266 (0.216-0.327) **</b> | <b>0.222 (0.187-0.265) **</b> |
| Obesity                   | Absence - presence                     | 1.015 (0.808-1.274)           | 1.138 (0.926-1.398)           |
| Hypertension              | Absence – presence                     | <b>0.650 (0.528-0.801) **</b> | <b>0.531 (0.444-0.635) **</b> |
| Diabetes                  | Absence - presence                     | <b>0.591 (0.480-0.727) **</b> | <b>0.568 (0.480-0.671) **</b> |
| Asthma                    | Absence - presence                     | <b>0.351 (0.198-0.621) **</b> | <b>0.598 (0.412-0.867) **</b> |
| Sinusitis                 | Absence - presence                     | 0.643 (0.413-1.001)           | 0.725 (0.505-1.041)           |
| Allergic rhinitis         | Absence - presence                     | 0.898 (0.610-1.321)           | 1.235 (0.898-1.699)           |
| Hyperlipidemia            | Absence - presence                     | <b>0.768 (0.624-0.945) *</b>  | 0.920 (0.775-1.092)           |
| Heart failure             | Absence - presence                     | <b>0.293 (0.112-0.767) *</b>  | 0.546 (0.203-1.463)           |
| Physical activity         | No - Yes                               | 1.209 (0.982-1.488)           | <b>1.374 (1.135-1.662) **</b> |
| Smoke                     | Non-smoker – smoker                    | <b>1.281 (1.002-1.638) *</b>  | 0.900 (0.533-1.521)           |
| Heavy drinking            | Non-Heavy drinking -<br>Heavy drinking | <b>2.417 (1.679-3.478) **</b> | 1.630 (0.744-3.572)           |

\*  $P < 0.05$

\*\*  $P < 0.01$

**Table S4.** The VIF value of the independent variables used in univariate multiple logistic regression in male and female.

| <b>Nutrition</b>            | <b>Male<br/>(VIF value)</b> | <b>Female<br/>(VIF value)</b> |
|-----------------------------|-----------------------------|-------------------------------|
| Water                       | 1.94                        | 2.05                          |
| Protein                     | 2.84                        | 4.04                          |
| Fat                         | -                           | 6.76                          |
| Saturated fatty acids       | -                           | 3.74                          |
| Monounsaturated fatty acids | 1.75                        | 4.21                          |
| Polyunsaturated fatty acids | -                           | 8.96                          |
| Omega-3 fatty acid          | -                           | 2.35                          |
| Omega-6 fatty acid          | -                           | 7.42                          |
| Cholesterol                 | -                           | 2.14                          |
| Carbohydrates               | -                           | 2.02                          |
| Dietary fiber               | 2.00                        | 2.70                          |
| Sugar                       | -                           | 1.77                          |
| Calcium                     | 1.88                        | 2.28                          |
| Phosphorus                  | -                           | 4.97                          |
| Iron                        | -                           | 2.47                          |
| Potassium                   | 3.10                        | 3.62                          |
| Vitamin A                   | -                           | 2.53                          |
| Carotene                    | -                           | 2.07                          |
| Vitamin B1                  | 1.99                        | 2.17                          |
| Vitamin B2                  | 2.63                        | 2.91                          |
| Vitamin B3                  | 2.47                        | 2.57                          |
| Vitamin B9                  | -                           | 2.60                          |
| Vitamin C                   | -                           | 1.63                          |
